# Supplementary material
Source: publisher site journal article supplement (https://www.spandidos-publications.com/1111/downloadSupplementary)
Supplement: Supplementary file 1 [file downloadSupplementary]

## Sheet: Ras_GO_enrichment_P
Table SVIII. GO enrichment and KEGG pathway of RAS.
#fg	216
#bg	14960
##Statistical test method: hypergeometric test
##FDR correction method: Benjamini and Hochberg
#Term	Database	ID	Input number	Background number	P-Value	Corrected P-Value	Input	Hyperlink
organ morphogenesis	Gene Ontology	GO:0009887	7	92	0.000367949	0.0164211	VDR|EVL|TLE1|NRP1|TBX3|CUL1|PBX1	http://amigo.geneontology.org/cgi-bin/amigo/term_details?term=GO:0009887
cellular component disassembly involved in apoptotic process	Gene Ontology	GO:0006921	5	48	0.000619077	0.0164211	BCAP31|PTK2|PLEC|FNTA|GSN	http://amigo.geneontology.org/cgi-bin/amigo/term_details?term=GO:0006921
cell death	Gene Ontology	GO:0008219	10	207	0.000864268	0.0164211	ZFYVE27|LRSAM1|EIF4G1|RTN2|SBF1|DNM2|ACO2|ATXN2|TDP1|ATXN1	http://amigo.geneontology.org/cgi-bin/amigo/term_details?term=GO:0008219
signal transduction	Gene Ontology	GO:0007165	26	1045	0.00462093	0.0540291	VDR|MAPK12|TLE1|SERGEF|MAP2K7|MAPK11|MAP2K5|DNM2|CAMLG|GAPVD1|FAM13A|CAP2|NR2F2|TMEM9B|S100A6|VAC14|IMPA1|APPL2|AGAP3|NRP1|ADCY6|GRB10|RIN1|MET|CANT1|BAIAP2	http://amigo.geneontology.org/cgi-bin/amigo/term_details?term=GO:0007165
axonogenesis	Gene Ontology	GO:0007409	5	78	0.00538695	0.0540291	BAIAP2|S100A6|PARD3|BRSK2|NUMB	http://amigo.geneontology.org/cgi-bin/amigo/term_details?term=GO:0007409
apoptotic process	Gene Ontology	GO:0006915	17	605	0.00682863	0.0540291	BCAP31|PTK2|PSMD9|FNTA|ADAMTSL4|PEA15|MFSD10|BID|RTN4|CSRNP2|IGFBP3|PLEC|ATG5|CHMP3|MAP2K7|PACS2|GSN	http://amigo.geneontology.org/cgi-bin/amigo/term_details?term=GO:0006915
regulation of transcription, DNA-dependent	Gene Ontology	GO:0006355	30	1305	0.00731612	0.0540291	NFYB|FIZ1|MAPK12|DNM2|ZNF780A|RREB1|MZF1|ZNF621|PPARGC1B|CNOT8|ZFP69|ZFP62|TCFL5|PBRM1|ZNF324B|MYNN|UBE2V1|PDE8A|ZNF638|SRRT|RBPMS|YEATS2|PRR13|ZBTB44|KANK1|TRIP6|PDPK1|PPIE|BZW1|EWSR1	http://amigo.geneontology.org/cgi-bin/amigo/term_details?term=GO:0006355
negative regulation of transcription, DNA-dependent	Gene Ontology	GO:0045892	14	464	0.00758303	0.0540291	LOXL3|RBFOX2|GATAD2A|TLE1|SUV39H2|PPARGC1B|NR2F2|YEATS2|TBX3|KDM4A|VDR|RREB1|DEDD2|ATXN1	http://amigo.geneontology.org/cgi-bin/amigo/term_details?term=GO:0045892
RNA metabolic process	Gene Ontology	GO:0016070	9	247	0.00981708	0.0569588	RPS24|PSMD9|RBFOX2|EIF4G1|UPF3B|CNOT8|RPS2|ATXN2|MAPK11	http://amigo.geneontology.org/cgi-bin/amigo/term_details?term=GO:0016070
transcription, DNA-dependent	Gene Ontology	GO:0006351	39	1857	0.00999278	0.0569588	ZNF621|NFYB|ZSCAN9|MAPK11|MAPK12|ZNF780A|POLR3H|STAT2|MZF1|ZSCAN16|NPAS2|USF2|KDM4A|CNOT8|ZFP69|BRWD1|ZFP62|SUV39H2|KANK1|AHRR|ZNF324B|MYNN|SRRT|ZNF638|GPBP1L1|TBX3|BZW1|FIZ1|RBPMS|ATXN1|PRR13|ZBTB44|PBRM1|TRIP6|PDPK1|GATAD2A|DEDD2|EWSR1|ZBTB25	http://amigo.geneontology.org/cgi-bin/amigo/term_details?term=GO:0006351
cell cycle	Gene Ontology	GO:0007049	8	214	0.0126292	0.0654422	PARD3|PRR5|APPL2|SEPT9|SEPT8|CHMP3|CHTF8|FANCI	http://amigo.geneontology.org/cgi-bin/amigo/term_details?term=GO:0007049
viral reproduction	Gene Ontology	GO:0016032	15	555	0.0149247	0.0708924	RPS24|BECN1|STAT2|DDX11|EIF4G1|CD46|CUL1|KDM4A|RPS2|CHMP3|PSMD9|CAMLG|VAC14|TCEB1|PACS2	http://amigo.geneontology.org/cgi-bin/amigo/term_details?term=GO:0016032
mRNA metabolic process	Gene Ontology	GO:0016071	8	224	0.0162263	0.0711463	RPS24|PSMD9|EIF4G1|UPF3B|CNOT8|PCBP2|RPS2|MAPK11	http://amigo.geneontology.org/cgi-bin/amigo/term_details?term=GO:0016071
G2/M transition of mitotic cell cycle	Gene Ontology	GO:0000086	6	143	0.0176337	0.0717942	CEP164|BRSK2|DDX11|DNM2|NDE1|CUL1	http://amigo.geneontology.org/cgi-bin/amigo/term_details?term=GO:0000086
protein dephosphorylation	Gene Ontology	GO:0006470	5	108	0.020151	0.0765738	SBF1|STYXL1|PPM1M|SSH2|PTPRB	http://amigo.geneontology.org/cgi-bin/amigo/term_details?term=GO:0006470
negative regulation of cell proliferation	Gene Ontology	GO:0008285	11	378	0.0216239	0.077035	CDKN2C|IFITM1|VDR|BECN1|CUL1|IGFBP3|CNOT8|STRN|PBRM1|PTPRJ|CHERP	http://amigo.geneontology.org/cgi-bin/amigo/term_details?term=GO:0008285
axon guidance	Gene Ontology	GO:0007411	10	334	0.0234685	0.0786884	ARHGEF12|PTK2|EVL|CLASP2|CAP2|MET|NUMB|ABLIM3|NRP1|SEMA4F	http://amigo.geneontology.org/cgi-bin/amigo/term_details?term=GO:0007411
Notch signaling pathway	Gene Ontology	GO:0007219	5	124	0.0339235	0.103602	DTX2|TLE1|CUL1|NUMB|DTX3	http://amigo.geneontology.org/cgi-bin/amigo/term_details?term=GO:0007219
gene expression	Gene Ontology	GO:0010467	16	672	0.034534	0.103602	RPS24|EIF3C|PSMD9|SLBP|EIF4G1|UBTF|POLR3GL|UPF3B|CNOT8|VDR|MAPK11|PCBP2|RPS2|TCEB1|POLR3H|ZBTB25	http://amigo.geneontology.org/cgi-bin/amigo/term_details?term=GO:0010467
nerve growth factor receptor signaling pathway	Gene Ontology	GO:0048011	8	273	0.0448955	0.127952	ARHGEF12|ZFYVE27|MAPK12|RTN4|ADCY6|MAPK11|MAP2K5|PDPK1	http://amigo.geneontology.org/cgi-bin/amigo/term_details?term=GO:0048011
cellular metabolic process	Gene Ontology	GO:0044237	5	142	0.0550825	0.14951	ATP5J|ACO2|NDUFA2|GALE|ATP5D	http://amigo.geneontology.org/cgi-bin/amigo/term_details?term=GO:0044237
defense response to virus	Gene Ontology	GO:0051607	5	145	0.0592105	0.153409	BECN1|IFITM1|PCBP2|STAT2|POLR3H	http://amigo.geneontology.org/cgi-bin/amigo/term_details?term=GO:0051607
Wnt receptor signaling pathway	Gene Ontology	GO:0016055	5	157	0.0774381	0.183916	PORCN|TLE1|NKD2|USP34|STRN	http://amigo.geneontology.org/cgi-bin/amigo/term_details?term=GO:0016055
phospholipid metabolic process	Gene Ontology	GO:0006644	5	157	0.0774381	0.183916	PLD3|MTMR14|VAC14|GPX4|PITPNB	http://amigo.geneontology.org/cgi-bin/amigo/term_details?term=GO:0006644
protein autophosphorylation	Gene Ontology	GO:0046777	5	161	0.0841162	0.191785	MET|CAMK2G|PTK2|MAP3K3|PDPK1	http://amigo.geneontology.org/cgi-bin/amigo/term_details?term=GO:0046777
regulation of apoptotic process	Gene Ontology	GO:0042981	5	166	0.0928777	0.203617	RTN4|PEA15|MADD|DEDD2|PSMD9	http://amigo.geneontology.org/cgi-bin/amigo/term_details?term=GO:0042981
intracellular signal transduction	Gene Ontology	GO:0035556	9	379	0.09903	0.207618	ADCY6|STYXL1|ARHGEF12|IFITM1|MAPK11|MAP3K3|PDPK1|DGKA|DEDD2	http://amigo.geneontology.org/cgi-bin/amigo/term_details?term=GO:0035556
ubiquitin-dependent protein catabolic process	Gene Ontology	GO:0006511	5	174	0.107828	0.207618	UBR3|PSMD9|RFFL|USP34|TCEB1	http://amigo.geneontology.org/cgi-bin/amigo/term_details?term=GO:0006511
nervous system development	Gene Ontology	GO:0007399	7	278	0.108641	0.207618	IGSF8|CAMK2G|LRCH4|CHERP|EVL|SEMA4F|SEMA4G	http://amigo.geneontology.org/cgi-bin/amigo/term_details?term=GO:0007399
DNA repair	Gene Ontology	GO:0006281	7	280	0.111679	0.207618	SMUG1|CEP164|MDC1|RAD52|RPAIN|TDP1|FANCI	http://amigo.geneontology.org/cgi-bin/amigo/term_details?term=GO:0006281
positive regulation of transcription, DNA-dependent	Gene Ontology	GO:0045893	11	503	0.112915	0.207618	PSMD9|GPBP1L1|NFYB|NPAS2|NR2F2|TBX3|DNM2|SMARCAD1|UBE2V1|ELF4|RREB1	http://amigo.geneontology.org/cgi-bin/amigo/term_details?term=GO:0045893
small molecule metabolic process	Gene Ontology	GO:0044281	26	1413	0.118105	0.210375	AOX1|PSMD9|NFYB|DNM2|PITPNB|HMBS|FADS2|NPAS2|PPARGC1B|SPTLC1|ATP5D|ATP5J|PKM|CA5B|MTMR14|NDUFA2|HMGCL|PHKA2|GALE|IMPA1|ACO2|ADCY6|PLD3|VAC14|HMOX2|GPX4	http://amigo.geneontology.org/cgi-bin/amigo/term_details?term=GO:0044281
protein transport	Gene Ontology	GO:0015031	9	402	0.128776	0.222431	MVP|POM121C|RAB34|LRSAM1|SNX19|VPS52|CHMP3|SEC16A|C15orf38-AP3S2	http://amigo.geneontology.org/cgi-bin/amigo/term_details?term=GO:0015031
mitosis	Gene Ontology	GO:0007067	6	243	0.140433	0.235431	CEP164|BRSK2|PBRM1|NDE1|ZWILCH|CLASP2	http://amigo.geneontology.org/cgi-bin/amigo/term_details?term=GO:0007067
cellular protein metabolic process	Gene Ontology	GO:0044267	11	530	0.145767	0.237391	SUMF2|RPS24|EIF3C|IGFBP3|TUBB6|EIF4G1|DDX11|MAN2A2|MGAT1|GPAA1|RPS2	http://amigo.geneontology.org/cgi-bin/amigo/term_details?term=GO:0044267
mRNA processing	Gene Ontology	GO:0006397	5	195	0.152151	0.240905	SMN2|FIP1L1|RBFOX2|HNRNPLL|TSEN54	http://amigo.geneontology.org/cgi-bin/amigo/term_details?term=GO:0006397
post-translational protein modification	Gene Ontology	GO:0043687	5	201	0.166038	0.255789	SUMF2|MGAT1|MAN2A2|GPAA1|ATG5	http://amigo.geneontology.org/cgi-bin/amigo/term_details?term=GO:0043687
translation	Gene Ontology	GO:0006412	6	259	0.172646	0.258968	RPS24|MRRF|EIF4G1|EIF3C|MRPL55|RPS2	http://amigo.geneontology.org/cgi-bin/amigo/term_details?term=GO:0006412
angiogenesis	Gene Ontology	GO:0001525	5	206	0.177982	0.260128	RTN4|PTK2|PTPRB|ANXA2|NRP1	http://amigo.geneontology.org/cgi-bin/amigo/term_details?term=GO:0001525
positive regulation of transcription from RNA polymerase II promoter	Gene Ontology	GO:0045944	14	749	0.195275	0.278267	PUS1|VDR|MAP2K5|AAMDC|NPAS2|PPARGC1B|USF2|MET|CAPRIN2|CSRNP2|ABLIM3|DBP|ELF4|ATXN1	http://amigo.geneontology.org/cgi-bin/amigo/term_details?term=GO:0045944
in utero embryonic development	Gene Ontology	GO:0001701	5	220	0.213032	0.291707	UBR3|TBX3|MGAT1|GATAD2A|PITPNB	http://amigo.geneontology.org/cgi-bin/amigo/term_details?term=GO:0001701
transmembrane transport	Gene Ontology	GO:0055085	11	578	0.214942	0.291707	ADCY6|SLC37A1|SLC38A1|SLC22A18|KCNAB1|HMOX2|MFSD10|SLC25A36|SLC26A6|SLC39A1|SLC39A7	http://amigo.geneontology.org/cgi-bin/amigo/term_details?term=GO:0055085
regulation of transcription from RNA polymerase II promoter	Gene Ontology	GO:0006357	6	283	0.225968	0.298076	STAT2|TCEB1|NR2F2|TBX3|DBP|BRWD1	http://amigo.geneontology.org/cgi-bin/amigo/term_details?term=GO:0006357
cell proliferation	Gene Ontology	GO:0008283	7	344	0.230094	0.298076	MVP|IGSF8|SRRT|MET|APPL2|DLGAP5|CUL1	http://amigo.geneontology.org/cgi-bin/amigo/term_details?term=GO:0008283
transcription from RNA polymerase II promoter	Gene Ontology	GO:0006366	8	407	0.235944	0.29837	SLBP|TCFL5|TCEB1|PPARGC1B|USF2|UPF3B|ELF4|RREB1	http://amigo.geneontology.org/cgi-bin/amigo/term_details?term=GO:0006366
transport	Gene Ontology	GO:0006810	7	349	0.24079	0.29837	SLC35F3|MTCH1|MFSD10|UBL4A|PEA15|SLC25A36|PITPNB	http://amigo.geneontology.org/cgi-bin/amigo/term_details?term=GO:0006810
carbohydrate metabolic process	Gene Ontology	GO:0005975	7	354	0.251645	0.299295	BPGM|MGAT1|MAN2A2|PHKA2|GALE|GLB1L|PKM	http://amigo.geneontology.org/cgi-bin/amigo/term_details?term=GO:0005975
positive regulation of apoptotic process	Gene Ontology	GO:0043065	6	294	0.252038	0.299295	ARHGEF12|ADAMTSL4|MTCH1|BID|IGFBP3|DNM2	http://amigo.geneontology.org/cgi-bin/amigo/term_details?term=GO:0043065
cell differentiation	Gene Ontology	GO:0030154	7	395	0.345114	0.401459	CAMK2G|BMP8B|TCFL5|SUV39H2|UBE2V1|ELF4|SEMA4G	http://amigo.geneontology.org/cgi-bin/amigo/term_details?term=GO:0030154
mitotic cell cycle	Gene Ontology	GO:0000278	7	403	0.363947	0.4149	CEP164|PSMD9|CLASP2|CDKN2C|NDE1|ZWILCH|CUL1	http://amigo.geneontology.org/cgi-bin/amigo/term_details?term=GO:0000278
protein phosphorylation	Gene Ontology	GO:0006468	6	344	0.37807	0.422549	BRSK2|PHKA2|IGFBP3|DMPK|STK39|PDPK1	http://amigo.geneontology.org/cgi-bin/amigo/term_details?term=GO:0006468
innate immune response	Gene Ontology	GO:0045087	12	754	0.406673	0.445776	BAIAP2|ADCY6|PTK2|CD46|POLR3GL|PCBP2|MAP2K7|MAPK11|ATG5|UBE2V1|PDPK1|POLR3H	http://amigo.geneontology.org/cgi-bin/amigo/term_details?term=GO:0045087
synaptic transmission	Gene Ontology	GO:0007268	6	389	0.493063	0.530275	EPB41L1|ADCY6|SLC38A1|CAMK2G|KCNAB1|PDPK1	http://amigo.geneontology.org/cgi-bin/amigo/term_details?term=GO:0007268
negative regulation of apoptotic process	Gene Ontology	GO:0043066	7	475	0.532002	0.561557	PTK2|PSMD9|AAMDC|TBX3|ATG5|BECN1|AMIGO2	http://amigo.geneontology.org/cgi-bin/amigo/term_details?term=GO:0043066
blood coagulation	Gene Ontology	GO:0007596	6	469	0.674769	0.699306	PTK2|KIF9|GRB7|PDPK1|DGKA|PTPRJ	http://amigo.geneontology.org/cgi-bin/amigo/term_details?term=GO:0007596
positive regulation of cell proliferation	Gene Ontology	GO:0008284	5	429	0.746068	0.759391	CNOT8|TBX3|PTK2|DDX11|PBX1	http://amigo.geneontology.org/cgi-bin/amigo/term_details?term=GO:0008284
negative regulation of transcription from RNA polymerase II promoter	Gene Ontology	GO:0000122	6	565	0.829969	0.829969	VDR|NR2F2|YEATS2|TBX3|MAP2K5|AHRR	http://amigo.geneontology.org/cgi-bin/amigo/term_details?term=GO:0000122

## Sheet: Ras_KEGG_pathway_iden
#fg	109
#bg	6644
##Statistical test method: hypergeometric test
##FDR correction method: Benjamini and Hochberg
#Term	Database	ID	Input number	Background number	P-Value	Corrected P-Value	Input	Hyperlink
Adherens junction	KEGG PATHWAY	hsa04520	6	73	0.0011852	0.205039	PARD3|ACP1|MET|PTPRB|BAIAP2|PTPRJ	http://www.genome.jp/kegg-bin/show_pathway?hsa04520/hsa:5787%09red/hsa:52%09red/hsa:4233%09red/hsa:10458%09red/hsa:56288%09red/hsa:5795%09red
GnRH signaling pathway	KEGG PATHWAY	hsa04912	6	92	0.00386332	0.29455	ADCY6|MAP3K3|CAMK2G|MAP2K7|MAPK11|MAPK12	http://www.genome.jp/kegg-bin/show_pathway?hsa04912/hsa:818%09red/hsa:112%09red/hsa:4215%09red/hsa:5600%09red/hsa:6300%09red/hsa:5609%09red
Axon guidance	KEGG PATHWAY	hsa04360	7	129	0.00510781	0.29455	ARHGEF12|PTK2|MET|ABLIM3|NRP1|SEMA4F|SEMA4G	http://www.genome.jp/kegg-bin/show_pathway?hsa04360/hsa:22885%09red/hsa:8829%09red/hsa:57715%09red/hsa:5747%09red/hsa:4233%09red/hsa:23365%09red/hsa:10505%09red
Bacterial invasion of epithelial cells	KEGG PATHWAY	hsa05100	5	76	0.00795458	0.344036	MET|PTK2|SEPT9|SEPT8|DNM2	http://www.genome.jp/kegg-bin/show_pathway?hsa05100/hsa:23176%09red/hsa:1785%09red/hsa:5747%09red/hsa:4233%09red/hsa:10801%09red
Neurotrophin signaling pathway	KEGG PATHWAY	hsa04722	6	120	0.0137037	0.474149	MAPK12|MAP3K3|CAMK2G|MAP2K7|MAPK11|MAP2K5	http://www.genome.jp/kegg-bin/show_pathway?hsa04722/hsa:818%09red/hsa:5607%09red/hsa:4215%09red/hsa:5600%09red/hsa:6300%09red/hsa:5609%09red
Tuberculosis	KEGG PATHWAY	hsa05152	7	180	0.0280443	0.74226	ARHGEF12|VDR|BID|CAMK2G|NFYB|MAPK11|MAPK12	http://www.genome.jp/kegg-bin/show_pathway?hsa05152/hsa:637%09red/hsa:818%09red/hsa:4801%09red/hsa:23365%09red/hsa:7421%09red/hsa:5600%09red/hsa:6300%09red
One carbon pool by folate	KEGG PATHWAY	hsa00670	2	20	0.041813	0.74226	MTHFD1L|DHFRL1	http://www.genome.jp/kegg-bin/show_pathway?hsa00670/hsa:200895%09red/hsa:25902%09red
Endocrine and other factor-regulated calcium reabsorption	KEGG PATHWAY	hsa04961	3	48	0.0436014	0.74226	ADCY6|VDR|DNM2	http://www.genome.jp/kegg-bin/show_pathway?hsa04961/hsa:112%09red/hsa:7421%09red/hsa:1785%09red
Notch signaling pathway	KEGG PATHWAY	hsa04330	3	48	0.0436014	0.74226	DTX2|NUMB|DTX3	http://www.genome.jp/kegg-bin/show_pathway?hsa04330/hsa:113878%09red/hsa:8650%09red/hsa:196403%09red
Mineral absorption	KEGG PATHWAY	hsa04978	3	51	0.0506981	0.74226	VDR|SLC26A6|HMOX2	http://www.genome.jp/kegg-bin/show_pathway?hsa04978/hsa:7421%09red/hsa:65010%09red/hsa:3163%09red
Amyotrophic lateral sclerosis (ALS)	KEGG PATHWAY	hsa05014	3	53	0.0557221	0.74226	BID|MAPK11|MAPK12	http://www.genome.jp/kegg-bin/show_pathway?hsa05014/hsa:637%09red/hsa:6300%09red/hsa:5600%09red
Purine metabolism	KEGG PATHWAY	hsa00230	6	169	0.0587401	0.74226	ADCY6|POLR3GL|CANT1|PDE8A|POLR3H|PKM	http://www.genome.jp/kegg-bin/show_pathway?hsa00230/hsa:5151%09red/hsa:171568%09red/hsa:84265%09red/hsa:112%09red/hsa:5315%09red/hsa:124583%09red
Alzheimer's disease	KEGG PATHWAY	hsa05010	6	170	0.0601098	0.74226	BACE1|BACE2|NDUFA2|BID|ATP5J|ATP5D	http://www.genome.jp/kegg-bin/show_pathway?hsa05010/hsa:637%09red/hsa:23621%09red/hsa:4695%09red/hsa:513%09red/hsa:25825%09red/hsa:522%09red
NOD-like receptor signaling pathway	KEGG PATHWAY	hsa04621	3	57	0.0664508	0.74226	TRIP6|MAPK11|MAPK12	http://www.genome.jp/kegg-bin/show_pathway?hsa04621/hsa:6300%09red/hsa:7205%09red/hsa:5600%09red
Transcriptional misregulation in cancer	KEGG PATHWAY	hsa05202	6	179	0.0732957	0.74226	CDKN2C|PTK2|IGFBP3|MET|EWSR1|PBX1	http://www.genome.jp/kegg-bin/show_pathway?hsa05202/hsa:1031%09red/hsa:2130%09red/hsa:5747%09red/hsa:4233%09red/hsa:3486%09red/hsa:5087%09red
Shigellosis	KEGG PATHWAY	hsa05131	3	61	0.0780502	0.74226	MAPK11|MAPK12|ATG5	http://www.genome.jp/kegg-bin/show_pathway?hsa05131/hsa:9474%09red/hsa:6300%09red/hsa:5600%09red
VEGF signaling pathway	KEGG PATHWAY	hsa04370	3	63	0.0841613	0.74226	PTK2|MAPK11|MAPK12	http://www.genome.jp/kegg-bin/show_pathway?hsa04370/hsa:6300%09red/hsa:5747%09red/hsa:5600%09red
Circadian rhythm	KEGG PATHWAY	hsa04710	2	31	0.0911925	0.74226	CUL1|NPAS2	http://www.genome.jp/kegg-bin/show_pathway?hsa04710/hsa:8454%09red/hsa:4862%09red
Vitamin B6 metabolism	KEGG PATHWAY	hsa00750	1	6	0.0945188	0.74226	AOX1	http://www.genome.jp/kegg-bin/show_pathway?hsa00750/hsa:316%09red
RNA polymerase	KEGG PATHWAY	hsa03020	2	32	0.0962665	0.74226	POLR3H|POLR3GL	http://www.genome.jp/kegg-bin/show_pathway?hsa03020/hsa:171568%09red/hsa:84265%09red
Epithelial cell signaling in Helicobacter pylori infection	KEGG PATHWAY	hsa05120	3	68	0.100295	0.74226	MET|MAPK11|MAPK12	http://www.genome.jp/kegg-bin/show_pathway?hsa05120/hsa:6300%09red/hsa:4233%09red/hsa:5600%09red
Regulation of autophagy	KEGG PATHWAY	hsa04140	2	34	0.106647	0.74226	BECN1|ATG5	http://www.genome.jp/kegg-bin/show_pathway?hsa04140/hsa:9474%09red/hsa:8678%09red
Fc epsilon RI signaling pathway	KEGG PATHWAY	hsa04664	3	70	0.107073	0.74226	MAP2K7|MAPK11|MAPK12	http://www.genome.jp/kegg-bin/show_pathway?hsa04664/hsa:6300%09red/hsa:5609%09red/hsa:5600%09red
Viral myocarditis	KEGG PATHWAY	hsa05416	3	71	0.110528	0.74226	BID|EIF4G1|DAG1	http://www.genome.jp/kegg-bin/show_pathway?hsa05416/hsa:637%09red/hsa:1981%09red/hsa:1605%09red
RIG-I-like receptor signaling pathway	KEGG PATHWAY	hsa04622	3	71	0.110528	0.74226	MAPK11|MAPK12|ATG5	http://www.genome.jp/kegg-bin/show_pathway?hsa04622/hsa:9474%09red/hsa:6300%09red/hsa:5600%09red
Oocyte meiosis	KEGG PATHWAY	hsa04114	4	112	0.111554	0.74226	ADCY6|CAMK2G|CUL1|MAPK12	http://www.genome.jp/kegg-bin/show_pathway?hsa04114/hsa:112%09red/hsa:6300%09red/hsa:818%09red/hsa:8454%09red
RNA transport	KEGG PATHWAY	hsa03013	5	164	0.131606	0.824243	SMN2|UPF3B|POM121C|EIF3C|EIF4G1	http://www.genome.jp/kegg-bin/show_pathway?hsa03013/hsa:100101267%09red/hsa:1981%09red/hsa:8663%09red/hsa:65109%09red/hsa:6607%09red
Synthesis and degradation of ketone bodies	KEGG PATHWAY	hsa00072	1	9	0.138403	0.824243	HMGCL	http://www.genome.jp/kegg-bin/show_pathway?hsa00072/hsa:3155%09red
Porphyrin and chlorophyll metabolism	KEGG PATHWAY	hsa00860	2	43	0.156482	0.824243	HMBS|HMOX2	http://www.genome.jp/kegg-bin/show_pathway?hsa00860/hsa:3145%09red/hsa:3163%09red
Valine, leucine and isoleucine degradation	KEGG PATHWAY	hsa00280	2	44	0.162268	0.824243	HMGCL|AOX1	http://www.genome.jp/kegg-bin/show_pathway?hsa00280/hsa:3155%09red/hsa:316%09red
Proteoglycans in cancer	KEGG PATHWAY	hsa05205	6	225	0.163829	0.824243	ARHGEF12|PTK2|CAMK2G|MET|MAPK11|MAPK12	http://www.genome.jp/kegg-bin/show_pathway?hsa05205/hsa:818%09red/hsa:5747%09red/hsa:4233%09red/hsa:23365%09red/hsa:5600%09red/hsa:6300%09red
Progesterone-mediated oocyte maturation	KEGG PATHWAY	hsa04914	3	86	0.166979	0.824243	ADCY6|MAPK11|MAPK12	http://www.genome.jp/kegg-bin/show_pathway?hsa04914/hsa:112%09red/hsa:6300%09red/hsa:5600%09red
ErbB signaling pathway	KEGG PATHWAY	hsa04012	3	88	0.175067	0.824243	CAMK2G|PTK2|MAP2K7	http://www.genome.jp/kegg-bin/show_pathway?hsa04012/hsa:5747%09red/hsa:5609%09red/hsa:818%09red
Osteoclast differentiation	KEGG PATHWAY	hsa04380	4	134	0.177356	0.824243	MAP2K7|MAPK11|MAPK12|STAT2	http://www.genome.jp/kegg-bin/show_pathway?hsa04380/hsa:6300%09red/hsa:6773%09red/hsa:5609%09red/hsa:5600%09red
Gap junction	KEGG PATHWAY	hsa04540	3	89	0.179153	0.824243	TUBB6|ADCY6|MAP2K5	http://www.genome.jp/kegg-bin/show_pathway?hsa04540/hsa:5607%09red/hsa:112%09red/hsa:84617%09red
Amino sugar and nucleotide sugar metabolism	KEGG PATHWAY	hsa00520	2	49	0.191721	0.824243	GALE|GNE	http://www.genome.jp/kegg-bin/show_pathway?hsa00520/hsa:2582%09red/hsa:10020%09red
N-Glycan biosynthesis	KEGG PATHWAY	hsa00510	2	49	0.191721	0.824243	MGAT1|MAN2A2	http://www.genome.jp/kegg-bin/show_pathway?hsa00510/hsa:4245%09red/hsa:4122%09red
Riboflavin metabolism	KEGG PATHWAY	hsa00740	1	13	0.193652	0.824243	ACP1	http://www.genome.jp/kegg-bin/show_pathway?hsa00740/hsa:52%09red
Wnt signaling pathway	KEGG PATHWAY	hsa04310	4	141	0.200612	0.824243	PORCN|NKD2|CAMK2G|CUL1	http://www.genome.jp/kegg-bin/show_pathway?hsa04310/hsa:8454%09red/hsa:64840%09red/hsa:818%09red/hsa:85409%09red
Folate biosynthesis	KEGG PATHWAY	hsa00790	1	14	0.206907	0.824243	DHFRL1	http://www.genome.jp/kegg-bin/show_pathway?hsa00790/hsa:200895%09red
Metabolic pathways	KEGG PATHWAY	hsa01100	23	1182	0.213243	0.824243	AOX1|BPGM|DHFRL1|P4HA2|ATP5J|GNE|POLR3H|ATP5D|HMBS|MGAT1|PLD3|SPTLC1|DGKA|PKM|NDUFA2|HMGCL|MAN2A2|POLR3GL|IMPA1|ACO2|GALE|MTHFD1L|GPAA1	http://www.genome.jp/kegg-bin/show_pathway?hsa01100/hsa:316%09red/hsa:669%09red/hsa:23646%09red/hsa:513%09red/hsa:4122%09red/hsa:10558%09red/hsa:2582%09red/hsa:84265%09red/hsa:3145%09red/hsa:171568%09red/hsa:5315%09red/hsa:4245%09red/hsa:25902%09red/hsa:200895%09red/hsa:3612%09red/hsa:4695%09red/hsa:522%09red/hsa:50%09red/hsa:3155%09red/hsa:1606%09red/hsa:8974%09red/hsa:10020%09red/hsa:8733%09red
Epstein-Barr virus infection	KEGG PATHWAY	hsa05169	5	202	0.236889	0.824243	POLR3GL|POLR3H|MAP2K7|MAPK11|MAPK12	http://www.genome.jp/kegg-bin/show_pathway?hsa05169/hsa:171568%09red/hsa:6300%09red/hsa:84265%09red/hsa:5609%09red/hsa:5600%09red
Retrograde endocannabinoid signaling	KEGG PATHWAY	hsa04723	3	103	0.238714	0.824243	ADCY6|MAPK11|MAPK12	http://www.genome.jp/kegg-bin/show_pathway?hsa04723/hsa:112%09red/hsa:6300%09red/hsa:5600%09red
Endocytosis	KEGG PATHWAY	hsa04144	5	203	0.239944	0.824243	CHMP3|MET|PARD3|AGAP3|DNM2	http://www.genome.jp/kegg-bin/show_pathway?hsa04144/hsa:56288%09red/hsa:4233%09red/hsa:116988%09red/hsa:51652%09red/hsa:1785%09red
2-Oxocarboxylic acid metabolism	KEGG PATHWAY	hsa01210	1	17	0.245389	0.824243	ACO2	http://www.genome.jp/kegg-bin/show_pathway?hsa01210/hsa:50%09red
Pyrimidine metabolism	KEGG PATHWAY	hsa00240	3	105	0.247506	0.824243	POLR3H|CANT1|POLR3GL	http://www.genome.jp/kegg-bin/show_pathway?hsa00240/hsa:171568%09red/hsa:84265%09red/hsa:124583%09red
T cell receptor signaling pathway	KEGG PATHWAY	hsa04660	3	106	0.251921	0.824243	MAP2K7|MAPK11|MAPK12	http://www.genome.jp/kegg-bin/show_pathway?hsa04660/hsa:6300%09red/hsa:5609%09red/hsa:5600%09red
Toll-like receptor signaling pathway	KEGG PATHWAY	hsa04620	3	107	0.256348	0.824243	MAP2K7|MAPK11|MAPK12	http://www.genome.jp/kegg-bin/show_pathway?hsa04620/hsa:6300%09red/hsa:5609%09red/hsa:5600%09red
HTLV-I infection	KEGG PATHWAY	hsa05166	6	264	0.265209	0.824243	CDKN2C|ADCY6|MAP3K3|NFYB|VAC14|NRP1	http://www.genome.jp/kegg-bin/show_pathway?hsa05166/hsa:8829%09red/hsa:4801%09red/hsa:112%09red/hsa:4215%09red/hsa:55697%09red/hsa:1031%09red
TNF signaling pathway	KEGG PATHWAY	hsa04668	3	110	0.269693	0.824243	MAP2K7|MAPK11|MAPK12	http://www.genome.jp/kegg-bin/show_pathway?hsa04668/hsa:6300%09red/hsa:5609%09red/hsa:5600%09red
Cytosolic DNA-sensing pathway	KEGG PATHWAY	hsa04623	2	63	0.276709	0.824243	POLR3H|POLR3GL	http://www.genome.jp/kegg-bin/show_pathway?hsa04623/hsa:171568%09red/hsa:84265%09red
Regulation of actin cytoskeleton	KEGG PATHWAY	hsa04810	5	215	0.277393	0.824243	BAIAP2|ARHGEF12|PTK2|SSH2|GSN	http://www.genome.jp/kegg-bin/show_pathway?hsa04810/hsa:23365%09red/hsa:2934%09red/hsa:85464%09red/hsa:10458%09red/hsa:5747%09red
Biosynthesis of unsaturated fatty acids	KEGG PATHWAY	hsa01040	1	21	0.293835	0.824243	FADS2	http://www.genome.jp/kegg-bin/show_pathway?hsa01040/hsa:9415%09red
Terpenoid backbone biosynthesis	KEGG PATHWAY	hsa00900	1	21	0.293835	0.824243	FNTA	http://www.genome.jp/kegg-bin/show_pathway?hsa00900/hsa:2339%09red
Glycolysis / Gluconeogenesis	KEGG PATHWAY	hsa00010	2	66	0.295026	0.824243	BPGM|PKM	http://www.genome.jp/kegg-bin/show_pathway?hsa00010/hsa:5315%09red/hsa:669%09red
Renal cell carcinoma	KEGG PATHWAY	hsa05211	2	66	0.295026	0.824243	MET|TCEB1	http://www.genome.jp/kegg-bin/show_pathway?hsa05211/hsa:6921%09red/hsa:4233%09red
Leukocyte transendothelial migration	KEGG PATHWAY	hsa04670	3	118	0.30562	0.824243	PTK2|MAPK11|MAPK12	http://www.genome.jp/kegg-bin/show_pathway?hsa04670/hsa:6300%09red/hsa:5747%09red/hsa:5600%09red
p53 signaling pathway	KEGG PATHWAY	hsa04115	2	68	0.307205	0.824243	IGFBP3|BID	http://www.genome.jp/kegg-bin/show_pathway?hsa04115/hsa:637%09red/hsa:3486%09red
PPAR signaling pathway	KEGG PATHWAY	hsa03320	2	71	0.325399	0.824243	PDPK1|FADS2	http://www.genome.jp/kegg-bin/show_pathway?hsa03320/hsa:9415%09red/hsa:5170%09red
Influenza A	KEGG PATHWAY	hsa05164	4	176	0.326942	0.824243	MAP2K7|MAPK11|MAPK12|STAT2	http://www.genome.jp/kegg-bin/show_pathway?hsa05164/hsa:6300%09red/hsa:6773%09red/hsa:5609%09red/hsa:5600%09red
Glyoxylate and dicarboxylate metabolism	KEGG PATHWAY	hsa00630	1	24	0.328136	0.824243	ACO2	http://www.genome.jp/kegg-bin/show_pathway?hsa00630/hsa:50%09red
Biosynthesis of amino acids	KEGG PATHWAY	hsa01230	2	72	0.331438	0.824243	ACO2|PKM	http://www.genome.jp/kegg-bin/show_pathway?hsa01230/hsa:5315%09red/hsa:50%09red
Prolactin signaling pathway	KEGG PATHWAY	hsa04917	2	72	0.331438	0.824243	MAPK11|MAPK12	http://www.genome.jp/kegg-bin/show_pathway?hsa04917/hsa:6300%09red/hsa:5600%09red
Leishmaniasis	KEGG PATHWAY	hsa05140	2	73	0.337463	0.824243	MAPK11|MAPK12	http://www.genome.jp/kegg-bin/show_pathway?hsa05140/hsa:6300%09red/hsa:5600%09red
Glycosylphosphatidylinositol(GPI)-anchor biosynthesis	KEGG PATHWAY	hsa00563	1	25	0.339198	0.824243	GPAA1	http://www.genome.jp/kegg-bin/show_pathway?hsa00563/hsa:8733%09red
alpha-Linolenic acid metabolism	KEGG PATHWAY	hsa00592	1	25	0.339198	0.824243	FADS2	http://www.genome.jp/kegg-bin/show_pathway?hsa00592/hsa:9415%09red
Pertussis	KEGG PATHWAY	hsa05133	2	75	0.349463	0.824243	MAPK11|MAPK12	http://www.genome.jp/kegg-bin/show_pathway?hsa05133/hsa:6300%09red/hsa:5600%09red
Gastric acid secretion	KEGG PATHWAY	hsa04971	2	75	0.349463	0.824243	ADCY6|CAMK2G	http://www.genome.jp/kegg-bin/show_pathway?hsa04971/hsa:112%09red/hsa:818%09red
Nitrogen metabolism	KEGG PATHWAY	hsa00910	1	27	0.360784	0.824243	CA5B	http://www.genome.jp/kegg-bin/show_pathway?hsa00910/hsa:11238%09red
Parkinson's disease	KEGG PATHWAY	hsa05012	3	131	0.364304	0.824243	ATP5J|NDUFA2|ATP5D	http://www.genome.jp/kegg-bin/show_pathway?hsa05012/hsa:522%09red/hsa:513%09red/hsa:4695%09red
Dopaminergic synapse	KEGG PATHWAY	hsa04728	3	131	0.364304	0.824243	CAMK2G|MAPK11|MAPK12	http://www.genome.jp/kegg-bin/show_pathway?hsa04728/hsa:6300%09red/hsa:818%09red/hsa:5600%09red
Nicotinate and nicotinamide metabolism	KEGG PATHWAY	hsa00760	1	28	0.371314	0.824243	AOX1	http://www.genome.jp/kegg-bin/show_pathway?hsa00760/hsa:316%09red
Homologous recombination	KEGG PATHWAY	hsa03440	1	28	0.371314	0.824243	RAD52	http://www.genome.jp/kegg-bin/show_pathway?hsa03440/hsa:5893%09red
Hepatitis C	KEGG PATHWAY	hsa05160	3	133	0.373295	0.824243	MAPK11|MAPK12|STAT2	http://www.genome.jp/kegg-bin/show_pathway?hsa05160/hsa:6300%09red/hsa:6773%09red/hsa:5600%09red
Oxidative phosphorylation	KEGG PATHWAY	hsa00190	3	133	0.373295	0.824243	ATP5J|NDUFA2|ATP5D	http://www.genome.jp/kegg-bin/show_pathway?hsa00190/hsa:522%09red/hsa:513%09red/hsa:4695%09red
Chemokine signaling pathway	KEGG PATHWAY	hsa04062	4	189	0.375759	0.824243	ADCY6|PTK2|STAT2|PARD3	http://www.genome.jp/kegg-bin/show_pathway?hsa04062/hsa:112%09red/hsa:6773%09red/hsa:56288%09red/hsa:5747%09red
TGF-beta signaling pathway	KEGG PATHWAY	hsa04350	2	80	0.379134	0.824243	CUL1|BMP8B	http://www.genome.jp/kegg-bin/show_pathway?hsa04350/hsa:8454%09red/hsa:656%09red
Butanoate metabolism	KEGG PATHWAY	hsa00650	1	29	0.381672	0.824243	HMGCL	http://www.genome.jp/kegg-bin/show_pathway?hsa00650/hsa:3155%09red
Peroxisome	KEGG PATHWAY	hsa04146	2	81	0.385003	0.824243	HMGCL|MPV17	http://www.genome.jp/kegg-bin/show_pathway?hsa04146/hsa:3155%09red/hsa:4358%09red
Phosphatidylinositol signaling system	KEGG PATHWAY	hsa04070	2	81	0.385003	0.824243	IMPA1|DGKA	http://www.genome.jp/kegg-bin/show_pathway?hsa04070/hsa:3612%09red/hsa:1606%09red
Galactose metabolism	KEGG PATHWAY	hsa00052	1	30	0.39186	0.824243	GALE	http://www.genome.jp/kegg-bin/show_pathway?hsa00052/hsa:2582%09red
Citrate cycle (TCA cycle)	KEGG PATHWAY	hsa00020	1	30	0.39186	0.824243	ACO2	http://www.genome.jp/kegg-bin/show_pathway?hsa00020/hsa:50%09red
Ubiquitin mediated proteolysis	KEGG PATHWAY	hsa04120	3	138	0.395664	0.824243	TCEB1|MGRN1|CUL1	http://www.genome.jp/kegg-bin/show_pathway?hsa04120/hsa:23295%09red/hsa:8454%09red/hsa:6921%09red
Alanine, aspartate and glutamate metabolism	KEGG PATHWAY	hsa00250	1	32	0.411741	0.824243	NIT2	http://www.genome.jp/kegg-bin/show_pathway?hsa00250/hsa:56954%09red
Insulin secretion	KEGG PATHWAY	hsa04911	2	87	0.4197	0.824243	ADCY6|CAMK2G	http://www.genome.jp/kegg-bin/show_pathway?hsa04911/hsa:112%09red/hsa:818%09red
Salmonella infection	KEGG PATHWAY	hsa05132	2	87	0.4197	0.824243	MAPK11|MAPK12	http://www.genome.jp/kegg-bin/show_pathway?hsa05132/hsa:6300%09red/hsa:5600%09red
Base excision repair	KEGG PATHWAY	hsa03410	1	33	0.421439	0.824243	SMUG1	http://www.genome.jp/kegg-bin/show_pathway?hsa03410/hsa:23583%09red
MAPK signaling pathway	KEGG PATHWAY	hsa04010	5	260	0.424267	0.824243	MAP2K5|MAP3K3|MAP2K7|MAPK11|MAPK12	http://www.genome.jp/kegg-bin/show_pathway?hsa04010/hsa:5607%09red/hsa:4215%09red/hsa:6300%09red/hsa:5609%09red/hsa:5600%09red
GABAergic synapse	KEGG PATHWAY	hsa04727	2	90	0.436681	0.824243	ADCY6|SLC38A1	http://www.genome.jp/kegg-bin/show_pathway?hsa04727/hsa:112%09red/hsa:81539%09red
Dilated cardiomyopathy	KEGG PATHWAY	hsa05414	2	91	0.442283	0.824243	ADCY6|DAG1	http://www.genome.jp/kegg-bin/show_pathway?hsa05414/hsa:112%09red/hsa:1605%09red
Fc gamma R-mediated phagocytosis	KEGG PATHWAY	hsa04666	2	91	0.442283	0.824243	GSN|DNM2	http://www.genome.jp/kegg-bin/show_pathway?hsa04666/hsa:2934%09red/hsa:1785%09red
Glycerophospholipid metabolism	KEGG PATHWAY	hsa00564	2	91	0.442283	0.824243	DGKA|PLD3	http://www.genome.jp/kegg-bin/show_pathway?hsa00564/hsa:23646%09red/hsa:1606%09red
mRNA surveillance pathway	KEGG PATHWAY	hsa03015	2	92	0.447855	0.824243	FIP1L1|UPF3B	http://www.genome.jp/kegg-bin/show_pathway?hsa03015/hsa:65109%09red/hsa:81608%09red
Carbon metabolism	KEGG PATHWAY	hsa01200	2	92	0.447855	0.824243	ACO2|PKM	http://www.genome.jp/kegg-bin/show_pathway?hsa01200/hsa:5315%09red/hsa:50%09red
Morphine addiction	KEGG PATHWAY	hsa05032	2	93	0.453396	0.825657	ADCY6|PDE8A	http://www.genome.jp/kegg-bin/show_pathway?hsa05032/hsa:112%09red/hsa:5151%09red
Glycine, serine and threonine metabolism	KEGG PATHWAY	hsa00260	1	37	0.45867	0.826562	BPGM	http://www.genome.jp/kegg-bin/show_pathway?hsa00260/hsa:669%09red
Circadian entrainment	KEGG PATHWAY	hsa04713	2	97	0.475242	0.827135	ADCY6|CAMK2G	http://www.genome.jp/kegg-bin/show_pathway?hsa04713/hsa:112%09red/hsa:818%09red
Tyrosine metabolism	KEGG PATHWAY	hsa00350	1	39	0.476385	0.827135	AOX1	http://www.genome.jp/kegg-bin/show_pathway?hsa00350/hsa:316%09red
Aldosterone-regulated sodium reabsorption	KEGG PATHWAY	hsa04960	1	39	0.476385	0.827135	PDPK1	http://www.genome.jp/kegg-bin/show_pathway?hsa04960/hsa:5170%09red
Tryptophan metabolism	KEGG PATHWAY	hsa00380	1	40	0.485026	0.827135	AOX1	http://www.genome.jp/kegg-bin/show_pathway?hsa00380/hsa:316%09red
Pyruvate metabolism	KEGG PATHWAY	hsa00620	1	41	0.493526	0.827135	PKM	http://www.genome.jp/kegg-bin/show_pathway?hsa00620/hsa:5315%09red
Melanogenesis	KEGG PATHWAY	hsa04916	2	101	0.49656	0.827135	ADCY6|CAMK2G	http://www.genome.jp/kegg-bin/show_pathway?hsa04916/hsa:112%09red/hsa:818%09red
Ether lipid metabolism	KEGG PATHWAY	hsa00565	1	42	0.501887	0.827135	PLD3	http://www.genome.jp/kegg-bin/show_pathway?hsa00565/hsa:23646%09red
Chagas disease (American trypanosomiasis)	KEGG PATHWAY	hsa05142	2	105	0.517328	0.827135	MAPK11|MAPK12	http://www.genome.jp/kegg-bin/show_pathway?hsa05142/hsa:6300%09red/hsa:5600%09red
Protein processing in endoplasmic reticulum	KEGG PATHWAY	hsa04141	3	167	0.519802	0.827135	BCAP31|MAP2K7|CUL1	http://www.genome.jp/kegg-bin/show_pathway?hsa04141/hsa:8454%09red/hsa:10134%09red/hsa:5609%09red
HIF-1 signaling pathway	KEGG PATHWAY	hsa04066	2	106	0.522432	0.827135	TCEB1|CAMK2G	http://www.genome.jp/kegg-bin/show_pathway?hsa04066/hsa:6921%09red/hsa:818%09red
Vasopressin-regulated water reabsorption	KEGG PATHWAY	hsa04962	1	45	0.526157	0.827135	ADCY6	http://www.genome.jp/kegg-bin/show_pathway?hsa04962/hsa:112%09red
Sphingolipid metabolism	KEGG PATHWAY	hsa00600	1	47	0.541683	0.827135	SPTLC1	http://www.genome.jp/kegg-bin/show_pathway?hsa00600/hsa:10558%09red
Type II diabetes mellitus	KEGG PATHWAY	hsa04930	1	48	0.549255	0.827135	PKM	http://www.genome.jp/kegg-bin/show_pathway?hsa04930/hsa:5315%09red
Malaria	KEGG PATHWAY	hsa05144	1	49	0.556704	0.827135	MET	http://www.genome.jp/kegg-bin/show_pathway?hsa05144/hsa:4233%09red
Lysine degradation	KEGG PATHWAY	hsa00310	1	49	0.556704	0.827135	SUV39H2	http://www.genome.jp/kegg-bin/show_pathway?hsa00310/hsa:79723%09red
Cholinergic synapse	KEGG PATHWAY	hsa04725	2	113	0.557149	0.827135	ADCY6|CAMK2G	http://www.genome.jp/kegg-bin/show_pathway?hsa04725/hsa:112%09red/hsa:818%09red
Glutathione metabolism	KEGG PATHWAY	hsa00480	1	51	0.571237	0.827135	GPX4	http://www.genome.jp/kegg-bin/show_pathway?hsa00480/hsa:2879%09red
Ovarian steroidogenesis	KEGG PATHWAY	hsa04913	1	51	0.571237	0.827135	ADCY6	http://www.genome.jp/kegg-bin/show_pathway?hsa04913/hsa:112%09red
Endometrial cancer	KEGG PATHWAY	hsa05213	1	52	0.578326	0.827135	PDPK1	http://www.genome.jp/kegg-bin/show_pathway?hsa05213/hsa:5170%09red
Glutamatergic synapse	KEGG PATHWAY	hsa04724	2	118	0.580845	0.827135	ADCY6|SLC38A1	http://www.genome.jp/kegg-bin/show_pathway?hsa04724/hsa:112%09red/hsa:81539%09red
Huntington's disease	KEGG PATHWAY	hsa05016	3	183	0.582283	0.827135	ATP5J|NDUFA2|ATP5D	http://www.genome.jp/kegg-bin/show_pathway?hsa05016/hsa:522%09red/hsa:513%09red/hsa:4695%09red
Calcium signaling pathway	KEGG PATHWAY	hsa04020	3	183	0.582283	0.827135	ORAI2|CAMK2G|PHKA2	http://www.genome.jp/kegg-bin/show_pathway?hsa04020/hsa:5256%09red/hsa:80228%09red/hsa:818%09red
Taste transduction	KEGG PATHWAY	hsa04742	1	53	0.585298	0.827135	ADCY6	http://www.genome.jp/kegg-bin/show_pathway?hsa04742/hsa:112%09red
Toxoplasmosis	KEGG PATHWAY	hsa05145	2	119	0.585473	0.827135	MAPK11|MAPK12	http://www.genome.jp/kegg-bin/show_pathway?hsa05145/hsa:6300%09red/hsa:5600%09red
Non-small cell lung cancer	KEGG PATHWAY	hsa05223	1	54	0.592156	0.827135	PDPK1	http://www.genome.jp/kegg-bin/show_pathway?hsa05223/hsa:5170%09red
Fanconi anemia pathway	KEGG PATHWAY	hsa03460	1	54	0.592156	0.827135	FANCI	http://www.genome.jp/kegg-bin/show_pathway?hsa03460/hsa:55215%09red
Vascular smooth muscle contraction	KEGG PATHWAY	hsa04270	2	121	0.594616	0.827135	ADCY6|ARHGEF12	http://www.genome.jp/kegg-bin/show_pathway?hsa04270/hsa:23365%09red/hsa:112%09red
Pathogenic Escherichia coli infection	KEGG PATHWAY	hsa05130	1	55	0.598902	0.827135	TUBB6	http://www.genome.jp/kegg-bin/show_pathway?hsa05130/hsa:84617%09red
Glycerolipid metabolism	KEGG PATHWAY	hsa00561	1	55	0.598902	0.827135	DGKA	http://www.genome.jp/kegg-bin/show_pathway?hsa00561/hsa:1606%09red
Cell cycle	KEGG PATHWAY	hsa04110	2	124	0.60805	0.827135	CDKN2C|CUL1	http://www.genome.jp/kegg-bin/show_pathway?hsa04110/hsa:8454%09red/hsa:1031%09red
Arginine and proline metabolism	KEGG PATHWAY	hsa00330	1	57	0.612064	0.827135	P4HA2	http://www.genome.jp/kegg-bin/show_pathway?hsa00330/hsa:8974%09red
mTOR signaling pathway	KEGG PATHWAY	hsa04150	1	60	0.631008	0.827135	PDPK1	http://www.genome.jp/kegg-bin/show_pathway?hsa04150/hsa:5170%09red
Inositol phosphate metabolism	KEGG PATHWAY	hsa00562	1	61	0.637117	0.827135	IMPA1	http://www.genome.jp/kegg-bin/show_pathway?hsa00562/hsa:3612%09red
Spliceosome	KEGG PATHWAY	hsa03040	2	131	0.638091	0.827135	PPIE|CHERP	http://www.genome.jp/kegg-bin/show_pathway?hsa03040/hsa:10450%09red/hsa:10523%09red
Synaptic vesicle cycle	KEGG PATHWAY	hsa04721	1	63	0.649036	0.827135	DNM2	http://www.genome.jp/kegg-bin/show_pathway?hsa04721/hsa:1785%09red
Tight junction	KEGG PATHWAY	hsa04530	2	134	0.650409	0.827135	EPB41L1|PARD3	http://www.genome.jp/kegg-bin/show_pathway?hsa04530/hsa:2036%09red/hsa:56288%09red
Measles	KEGG PATHWAY	hsa05162	2	134	0.650409	0.827135	CD46|STAT2	http://www.genome.jp/kegg-bin/show_pathway?hsa05162/hsa:6773%09red/hsa:4179%09red
Ribosome	KEGG PATHWAY	hsa03010	2	136	0.658437	0.827135	RPS24|RPS2	http://www.genome.jp/kegg-bin/show_pathway?hsa03010/hsa:6229%09red/hsa:6187%09red
Glioma	KEGG PATHWAY	hsa05214	1	65	0.660566	0.827135	CAMK2G	http://www.genome.jp/kegg-bin/show_pathway?hsa05214/hsa:818%09red
Viral carcinogenesis	KEGG PATHWAY	hsa05203	3	207	0.665966	0.827135	GSN|VAC14|PKM	http://www.genome.jp/kegg-bin/show_pathway?hsa05203/hsa:5315%09red/hsa:2934%09red/hsa:55697%09red
Focal adhesion	KEGG PATHWAY	hsa04510	3	207	0.665966	0.827135	PDPK1|PTK2|MET	http://www.genome.jp/kegg-bin/show_pathway?hsa04510/hsa:5170%09red/hsa:4233%09red/hsa:5747%09red
Retinol metabolism	KEGG PATHWAY	hsa00830	1	68	0.677162	0.827135	AOX1	http://www.genome.jp/kegg-bin/show_pathway?hsa00830/hsa:316%09red
Insulin signaling pathway	KEGG PATHWAY	hsa04910	2	142	0.681646	0.827135	PDPK1|PHKA2	http://www.genome.jp/kegg-bin/show_pathway?hsa04910/hsa:5256%09red/hsa:5170%09red
Complement and coagulation cascades	KEGG PATHWAY	hsa04610	1	69	0.682513	0.827135	CD46	http://www.genome.jp/kegg-bin/show_pathway?hsa04610/hsa:4179%09red
Long-term potentiation	KEGG PATHWAY	hsa04720	1	69	0.682513	0.827135	CAMK2G	http://www.genome.jp/kegg-bin/show_pathway?hsa04720/hsa:818%09red
Amphetamine addiction	KEGG PATHWAY	hsa05031	1	70	0.687776	0.827135	CAMK2G	http://www.genome.jp/kegg-bin/show_pathway?hsa05031/hsa:818%09red
Melanoma	KEGG PATHWAY	hsa05218	1	71	0.692953	0.827135	MET	http://www.genome.jp/kegg-bin/show_pathway?hsa05218/hsa:4233%09red
Bile secretion	KEGG PATHWAY	hsa04976	1	72	0.698045	0.827135	ADCY6	http://www.genome.jp/kegg-bin/show_pathway?hsa04976/hsa:112%09red
Thyroid hormone synthesis	KEGG PATHWAY	hsa04918	1	72	0.698045	0.827135	ADCY6	http://www.genome.jp/kegg-bin/show_pathway?hsa04918/hsa:112%09red
RNA degradation	KEGG PATHWAY	hsa03018	1	72	0.698045	0.827135	CNOT8	http://www.genome.jp/kegg-bin/show_pathway?hsa03018/hsa:9337%09red
B cell receptor signaling pathway	KEGG PATHWAY	hsa04662	1	74	0.707979	0.82757	IFITM1	http://www.genome.jp/kegg-bin/show_pathway?hsa04662/hsa:8519%09red
Drug metabolism - cytochrome P450	KEGG PATHWAY	hsa00982	1	74	0.707979	0.82757	AOX1	http://www.genome.jp/kegg-bin/show_pathway?hsa00982/hsa:316%09red
Arrhythmogenic right ventricular cardiomyopathy (ARVC)	KEGG PATHWAY	hsa05412	1	75	0.712823	0.827641	DAG1	http://www.genome.jp/kegg-bin/show_pathway?hsa05412/hsa:1605%09red
Antigen processing and presentation	KEGG PATHWAY	hsa04612	1	78	0.726885	0.83733	NFYB	http://www.genome.jp/kegg-bin/show_pathway?hsa04612/hsa:4801%09red
Hippo signaling pathway	KEGG PATHWAY	hsa04390	2	156	0.730849	0.83733	PARD3|BMP8B	http://www.genome.jp/kegg-bin/show_pathway?hsa04390/hsa:56288%09red/hsa:656%09red
Hypertrophic cardiomyopathy (HCM)	KEGG PATHWAY	hsa05410	1	84	0.752994	0.855774	DAG1	http://www.genome.jp/kegg-bin/show_pathway?hsa05410/hsa:1605%09red
Small cell lung cancer	KEGG PATHWAY	hsa05222	1	86	0.761134	0.855774	PTK2	http://www.genome.jp/kegg-bin/show_pathway?hsa05222/hsa:5747%09red
ECM-receptor interaction	KEGG PATHWAY	hsa04512	1	87	0.765105	0.855774	DAG1	http://www.genome.jp/kegg-bin/show_pathway?hsa04512/hsa:1605%09red
Apoptosis	KEGG PATHWAY	hsa04210	1	88	0.769009	0.855774	BID	http://www.genome.jp/kegg-bin/show_pathway?hsa04210/hsa:637%09red
Prostate cancer	KEGG PATHWAY	hsa05215	1	89	0.77285	0.855774	PDPK1	http://www.genome.jp/kegg-bin/show_pathway?hsa05215/hsa:5170%09red
Salivary secretion	KEGG PATHWAY	hsa04970	1	90	0.776627	0.855774	ADCY6	http://www.genome.jp/kegg-bin/show_pathway?hsa04970/hsa:112%09red
Pathways in cancer	KEGG PATHWAY	hsa05200	4	327	0.791968	0.867155	MET|BID|PTK2|TCEB1	http://www.genome.jp/kegg-bin/show_pathway?hsa05200/hsa:637%09red/hsa:6921%09red/hsa:5747%09red/hsa:4233%09red
Pancreatic secretion	KEGG PATHWAY	hsa04972	1	96	0.798018	0.868284	ADCY6	http://www.genome.jp/kegg-bin/show_pathway?hsa04972/hsa:112%09red
Estrogen signaling pathway	KEGG PATHWAY	hsa04915	1	100	0.811138	0.873194	ADCY6	http://www.genome.jp/kegg-bin/show_pathway?hsa04915/hsa:112%09red
Herpes simplex infection	KEGG PATHWAY	hsa05168	2	185	0.812626	0.873194	STAT2|CUL1	http://www.genome.jp/kegg-bin/show_pathway?hsa05168/hsa:8454%09red/hsa:6773%09red
Amoebiasis	KEGG PATHWAY	hsa05146	1	109	0.83765	0.894528	PTK2	http://www.genome.jp/kegg-bin/show_pathway?hsa05146/hsa:5747%09red
Systemic lupus erythematosus	KEGG PATHWAY	hsa05322	1	135	0.895249	0.948049	HIST1H2AC	http://www.genome.jp/kegg-bin/show_pathway?hsa05322/hsa:8334%09red
Natural killer cell mediated cytotoxicity	KEGG PATHWAY	hsa04650	1	137	0.898728	0.948049	BID	http://www.genome.jp/kegg-bin/show_pathway?hsa04650/hsa:637%09red
Hepatitis B	KEGG PATHWAY	hsa05161	1	147	0.914479	0.956494	STAT2	http://www.genome.jp/kegg-bin/show_pathway?hsa05161/hsa:6773%09red
Phagosome	KEGG PATHWAY	hsa04145	1	154	0.924035	0.956494	TUBB6	http://www.genome.jp/kegg-bin/show_pathway?hsa04145/hsa:84617%09red
Jak-STAT signaling pathway	KEGG PATHWAY	hsa04630	1	157	0.927799	0.956494	STAT2	http://www.genome.jp/kegg-bin/show_pathway?hsa04630/hsa:6773%09red
PI3K-Akt signaling pathway	KEGG PATHWAY	hsa04151	3	346	0.928849	0.956494	PDPK1|PTK2|MET	http://www.genome.jp/kegg-bin/show_pathway?hsa04151/hsa:5170%09red/hsa:4233%09red/hsa:5747%09red
Alcoholism	KEGG PATHWAY	hsa05034	1	180	0.951137	0.973649	HIST1H2AC	http://www.genome.jp/kegg-bin/show_pathway?hsa05034/hsa:8334%09red
Cytokine-cytokine receptor interaction	KEGG PATHWAY	hsa04060	1	266	0.988791	0.999023	MET	http://www.genome.jp/kegg-bin/show_pathway?hsa04060/hsa:4233%09red
Neuroactive ligand-receptor interaction	KEGG PATHWAY	hsa04080	1	275	0.990403	0.999023	PARD3	http://www.genome.jp/kegg-bin/show_pathway?hsa04080/hsa:56288%09red
MicroRNAs in cancer	KEGG PATHWAY	hsa05206	1	296	0.993325	0.999023	MET	http://www.genome.jp/kegg-bin/show_pathway?hsa05206/hsa:4233%09red
Olfactory transduction	KEGG PATHWAY	hsa04740	1	406	0.999023	0.999023	CAMK2G	http://www.genome.jp/kegg-bin/show_pathway?hsa04740/hsa:818%09red
--------------------
#Term	Database	ID	Input number	Background number	P-Value	Corrected P-Value	Input	Hyperlink
--------------------
#Term	Database	ID	Input number	Background number	P-Value	Corrected P-Value	Input	Hyperlink
--------------------
